# Supplementary material
Source: PubMed Central journal article supplement (PMC10576429)
Supplement: NIHMS1932961-supplement-Supplementary_Information.pdf [file NIHMS1932961-supplement-Supplementary_Information.pdf]

Supplementary Table 1

| Subject  | Session ID    | ACC neurons | OFC neurons |
|----------|---------------|-------------|-------------|
| <b>C</b> | rec09         | —           | 29          |
|          | rec11         | 23          | —           |
|          | rec16         | 22          | 31          |
|          | rec33         | —           | 33          |
|          | rec36         | —           | 33          |
|          | rec41         | —           | 38          |
|          | rec42         | —           | 52          |
|          | rec60         | 107         | 42          |
|          | rec61         | 92          | 46          |
|          | rec62         | 60          | 17          |
|          | rec63         | 41          | 44          |
|          | rec65         | 47          | 34          |
|          | rec66         | 61          | 55          |
|          | <b>total:</b> | <b>453</b>  | <b>454</b>  |
| <b>G</b> | rec28         | 99          | 107         |
|          | rec29         | 128         | 70          |
|          | rec31         | 112         | 95          |
|          | rec32         | 83          | 85          |
|          | rec33         | 95          | 72          |
|          | <b>total:</b> | <b>517</b>  | <b>429</b>  |

 good value & direction decoding  
 good value decoding

Number of recording sessions and neurons recorded per session in the two subjects. Only sessions with >60% accuracy in direction decoding (chance = 50%) and/or >40% accuracy in value decoding (chance = 25%) were included in the analyses.

Supplementary Table 2

*Frequency and duration of value states as a function of maximum value and value difference*

|                  | Chosen states                     |        |       |       | Unchosen states |         |        |        |
|------------------|-----------------------------------|--------|-------|-------|-----------------|---------|--------|--------|
|                  | C                                 |        | G     |       | C               |         | G      |        |
|                  | OFC                               | ACC    | OFC   | ACC   | OFC             | ACC     | OFC    | ACC    |
|                  | <b>Number of states per trial</b> |        |       |       |                 |         |        |        |
| Maximum value    | -0.05                             | 0.02   | 0.25* | 0.19* | -0.22*          | -0.34*  | -0.16* | -0.23* |
| Value difference | 0.01                              | 0.05   | -0.05 | -0.03 | 0.00            | 0.01    | -0.11* | -0.01  |
|                  | <b>Duration of each state</b>     |        |       |       |                 |         |        |        |
| Maximum value    | 5.1*                              | 12.43* | 11*   | 9.08* | -6.6*           | -11.52* | -7.0*  | -5.67* |
| Value difference | -0.05                             | 0.89   | -1.3  | -1.1  | -3.2*           | -9.08*  | -7.4*  | -5.48* |

Numbers refer to beta coefficients, \* =  $p < 0.01$
